# Supplementary material
Source: ML conference proceedings conference paper supplement (https://openreview.net/forum?id=rY8NwwLoceq)
Supplement: supplementary_material [file attachment]

# Set-Valued Prediction in Hierarchical Classification with Constrained Representation Complexity (Supplementary Material)

Thomas Mortier<sup>1</sup>

Eyke Hüllermeier<sup>2</sup>

Krzysztof Dembczyński<sup>3,4</sup>

Willem Waegeman<sup>1</sup>

<sup>1</sup>Dept. of Data Analysis and Mathematical Modelling, Ghent University, Coupure links 653, Ghent, Belgium

<sup>2</sup>Institute of Informatics, LMU Munich, Akademiestr. 7, Munich, Germany

<sup>3</sup>Institute of Computing Science, Poznań University of Technology, Piotrowo 2, Poznań, Poland

<sup>4</sup>Yahoo! Research, 770 Broadway, New York, USA

## A PROOF OF THEOREM 1

We first prove an intermediate result.

**Proposition 1.** *For any class space  $\mathcal{Y}$  and valid hierarchy  $\mathcal{T}$  we have that:*

$$\forall i, j \in [K-1] : \mathcal{R}_{\mathcal{T}}^{(i)} \neq \mathcal{R}_{\mathcal{T}}^{(j)} \implies \mathcal{R}_{\mathcal{T}}^{(i)} \cap \mathcal{R}_{\mathcal{T}}^{(j)} = \emptyset \quad (1)$$

*Proof.* Let  $i, j$  with  $\mathcal{R}_{\mathcal{T}}^{(i)} \neq \mathcal{R}_{\mathcal{T}}^{(j)}$  and assume that  $\mathcal{R}_{\mathcal{T}}^{(i)} \cap \mathcal{R}_{\mathcal{T}}^{(j)} \neq \emptyset$ . For  $\hat{Y} \in \mathcal{R}_{\mathcal{T}}^{(i)} \cap \mathcal{R}_{\mathcal{T}}^{(j)}$ , we know that:

$$R_{\mathcal{T}}(\hat{Y}) = i \Leftrightarrow \min_{\hat{V} \in \mathcal{S}_{\mathcal{T}}(\hat{Y})} |\hat{V}| = i,$$

$$R_{\mathcal{T}}(\hat{Y}) = j \Leftrightarrow \min_{\hat{V} \in \mathcal{S}_{\mathcal{T}}(\hat{Y})} |\hat{V}| = j,$$

and, hence, is only possible when  $i = j$ , which contradicts with the beginning of this proof.  $\square$

In order to prove Theorem 1, we need to show that the following conditions are met:

1.  $\forall i, j \in [K-1] : \mathcal{R}_{\mathcal{T}}^{(i)} \neq \mathcal{R}_{\mathcal{T}}^{(j)} \implies \mathcal{R}_{\mathcal{T}}^{(i)} \cap \mathcal{R}_{\mathcal{T}}^{(j)} = \emptyset$
2.  $\bigcup_{i \in [K-1]} \mathcal{R}_{\mathcal{T}}^{(i)} = \mathcal{P}(\mathcal{Y})$

The first condition is met due to Proposition 1. To show that the second condition is met, we need to prove that  $\hat{Y} \in \bigcup_{i \in [K-1]} \mathcal{R}_{\mathcal{T}}^{(i)} \implies \hat{Y} \in \mathcal{P}(\mathcal{Y}) \wedge \hat{Y} \in \mathcal{P}(\mathcal{Y}) \implies \hat{Y} \in \bigcup_{i \in [K-1]} \mathcal{R}_{\mathcal{T}}^{(i)}$ . We start by proving the first part, which follows trivially from the definition of a representation complexity class, as each set that belongs to a given representation complexity class must be element of  $\mathcal{P}(\mathcal{Y})$ . To prove the second part, it suffices to show that  $\forall \hat{Y} \in \mathcal{P}(\mathcal{Y}) : \mathcal{S}_{\mathcal{T}}(\hat{Y}) \neq \emptyset$ , or in other words, for each element  $\hat{Y}$  in  $\mathcal{P}(\mathcal{Y})$  there exists at least one  $\hat{V} \subset \mathcal{V}_{\mathcal{T}}$  such that:

$$\bigcup_{v_i \in \hat{V}} v_i = \hat{Y}, \quad \bigcap_{v_i \in \hat{V}} v_i = \emptyset.$$

Note that each element  $\hat{Y} \in \mathcal{P}(\mathcal{Y})$  can be represented by either a node in the hierarchy, the union of sets of leaf nodes in the hierarchy  $\mathcal{T}$ :

$$\hat{Y} = \bigcup_{c_i \in \hat{Y}} \{c_i\},$$

or by a union of internal and/or leaf nodes. From this, it follows that  $\mathcal{S}_{\mathcal{T}}(\hat{Y}) \neq \emptyset$  and  $R_{\mathcal{T}}(\hat{Y}) = \min_{\hat{V} \in \mathcal{S}_{\mathcal{T}}(\hat{Y})} |\hat{V}| = i$ , where  $i$  is lower bounded by one and upper bounded by  $|\hat{Y}|$ . Therefore, given the above, it follows that  $\forall \hat{Y} \in \mathcal{P}(\mathcal{Y}), \exists i \in [K-1] : \hat{Y} \in \mathcal{R}_{\mathcal{T}}^{(i)}$  which proves the second and last part of this proof.

## B EXPERIMENTAL SETUP

We use a MobileNetV2 convolutional neural network [Sandler et al., 2018], pretrained on ImageNet [Deng et al., 2009], to obtain hidden representations for all image datasets. For the bacteria dataset, tf-idf representations are obtained by means of extracting 3-, 4- and 5-grams from the 16S rRNA sequences that were provided in the dataset [Fiannaca et al., 2018]. For the proteins dataset, tf-idf representations are obtained by considering 3-grams only. Furthermore, to comply with literature, the tf-idf representations are concatenated with functional domain encodings, which contain distinct functional and evolutionary information about the protein sequence [Li et al., 2018]. Next, the obtained feature representations for the biological datasets are then passed through a single-layer neural net with 1000 output neurons and a ReLU activation function. We use the categorical cross-entropy loss by means of stochastic gradient descent with momentum, where the learning rate and momentum are set to  $1e-5$  and 0.99, respectively. For the models without hierarchical factorization, we set the number of epochs to 2 and 20, for the Caltech and other datasets, respectively. For the models with hierarchical factorization, we use 4 and 30, respectively. We train all models end-to-end on a GPU, by using the PyTorch library [Paszke et al., 2017] and infrastructure with the following specifications:

- **CPU:** i7-6800K 3.4 GHz (3.8 GHz Turbo Boost) – 6 cores / 12 threads,
- **GPU:** 2x Nvidia GTX 1080 Ti 11GB + 1x Nvidia Tesla K40c 11GB,
- **RAM:** 64GB DDR4-2666.

Finally, we implemented the RTS and TOP- $k$  algorithms in C++ by using the PyTorch C++ API [Paszke et al., 2017].

## References

- Jia Deng, Wei Dong, Richard Socher, Li-Jia Li, Kai Li, and Li Fei-Fei. Imagenet: A large-scale hierarchical image database. In *IEEE CVPR*, pages 248–255, 2009.
- Antonino Fiannaca, Laura La Paglia, Massimo La Rosa, Giosue Lo Bosco, Giovanni Renda, Riccardo Rizzo, Salvatore Gaglio, and Alfonso Urso. Deep learning models for bacteria taxonomic classification of metagenomic data. *BMC Bioinformatics*, 19-S(7):61–76, 2018.
- Yu Li, Sheng Wang, Ramzan Umarov, and et al. Deepre: sequence-based enzyme EC number prediction by deep learning. *BMC Bioinformatics*, 34(5):760–769, 2018.
- Adam Paszke, Sam Gross, Soumith Chintala, and et al. Automatic differentiation in pytorch. In *NIPS-W*, 2017.
- Mark Sandler, Andrew Howard, Menglong Zhu, Andrey Zhmoginov, and Liang-Chieh Chen. Mobilenetv2: Inverted residuals and linear bottlenecks, 2018.
